# Supplementary material for: Use of Acitretin Among Girls and Women of Childbearing Age and Occurrence of Acitretin-Exposed Pregnancies in Germany
Source: PubMed Central journal article supplement — Clin Drug Investig. 2023 Oct 31;43(11):865–72. doi: 10.1007/s40261-023-01314-2 (PMC10632260; doi:10.1007/s40261-023-01314-2), 2023-10-31
Supplement: 40261_2023_1314_MOESM1_ESM.pdf [file 40261_2023_1314_MOESM1_ESM.pdf]

## **Use of acitretin among girls and women of childbearing age and occurrence of acitretin-exposed pregnancies in Germany**

### **Journal: Clinical Drug Investigation**

Jonas Reinold<sup>1\*</sup>, Bianca Kollhorst<sup>2</sup>, Hellen L. Temme<sup>3,4</sup>, Nadine Wentzell<sup>1</sup>, Ulrike Haug<sup>1,5</sup>

<sup>1</sup> Department of Clinical Epidemiology, Leibniz Institute for Prevention Research and Epidemiology – BIPS, Achterstraße 30, 28359 Bremen, Germany

<sup>2</sup> Department of Biometry and Data Management, Leibniz Institute for Prevention Research and Epidemiology – BIPS, Achterstraße 30, 28359 Bremen, Germany

<sup>3</sup> Health Communication, Department of Implementation Research, Bernhard Nocht Institute for Tropical Medicine – BNITM, Bernhard-Nocht-Straße 74, 20359 Hamburg, Germany

<sup>4</sup> Institute for Planetary Health Behaviour, University of Erfurt – IPB, Nordhäuser Straße 63  
99089 Erfurt, Germany

<sup>5</sup> Faculty of Human and Health Sciences, University of Bremen, Grazer Straße 2, 28359 Bremen, Germany

\* Current Address: Jonas Reinold, Leibniz Institute for Prevention Research and Epidemiology – BIPS, Achterstraße 30, 28359 Bremen, Phone: +49 (0) 421 218-56868, E-Mail: [reinold@leibniz-bips.de](mailto:reinold@leibniz-bips.de)

**Table S1: Number of girls and women aged 13–49 years with at least one dispensation of acitretin, by age group and year of dispensation**

| Age group   | Study year     |                |                |                |                |                |                |                |                |                |                |                |                |                |                |               |        |
|-------------|----------------|----------------|----------------|----------------|----------------|----------------|----------------|----------------|----------------|----------------|----------------|----------------|----------------|----------------|----------------|---------------|--------|
|             | 2004           | 2005           | 2006           | 2007           | 2008           | 2009           | 2010           | 2011           | 2012           | 2013           | 2014           | 2015           | 2016           | 2017           | 2018           | 2019          | Total* |
| 13-20 years | 8<br>(3.9%)    | 5<br>(2.9%)    | 4<br>(1.9%)    | 2<br>(1.0%)    | 5<br>(2.5%)    | 4<br>(2.2%)    | 4<br>(1.9%)    | 1<br>(0.5%)    | 5<br>(2.5%)    | 7<br>(3.9%)    | 6<br>(2.9%)    | 8<br>(4.1%)    | 7<br>(3.5%)    | 8<br>(4.3%)    | 2<br>(1.2%)    | 7<br>(4.4%)   |        |
| 21-30 years | 21<br>(10.3%)  | 9<br>(5.2%)    | 14<br>(6.6%)   | 14<br>(7.3%)   | 15<br>(7.6%)   | 13<br>(7.3%)   | 12<br>(5.8%)   | 18<br>(9.6%)   | 15<br>(7.4%)   | 13<br>(7.2%)   | 25<br>(12.1%)  | 16<br>(8.2%)   | 23<br>(11.6%)  | 21<br>(11.4%)  | 16<br>(9.6%)   | 18<br>(11.3%) |        |
| 31-40 years | 62<br>(30.5%)  | 40<br>(23.3%)  | 51<br>(24.2%)  | 45<br>(23.6%)  | 37<br>(18.8%)  | 37<br>(20.8%)  | 40<br>(19.4%)  | 34<br>(18.1%)  | 31<br>(15.3%)  | 40<br>(22.2%)  | 35<br>(17.0%)  | 44<br>(22.7%)  | 46<br>(23.2%)  | 42<br>(22.8%)  | 42<br>(25.1%)  | 36<br>(22.6%) |        |
| 41-49 years | 112<br>(55.2%) | 118<br>(68.6%) | 142<br>(67.3%) | 130<br>(68.1%) | 140<br>(71.1%) | 124<br>(69.7%) | 150<br>(72.8%) | 135<br>(71.8%) | 152<br>(74.9%) | 120<br>(66.7%) | 140<br>(68.0%) | 126<br>(64.9%) | 122<br>(61.6%) | 113<br>(61.4%) | 107<br>(64.1%) | 98<br>(61.6%) |        |
| Total       | 203            | 172            | 211            | 191            | 197            | 178            | 206            | 188            | 203            | 180            | 206            | 194            | 198            | 184            | 167            | 159           | 1,773  |

\* Total number of girls / women aged 13–49 years with at least one dispensation of acitretin during the study period.

Note: This number is not the sum of the total number of each year given that a woman can have a dispensation of acitretin in different years of the study period and is then counted in each of these years but only once for the total sum.
